# Supplementary material for: Design and Characterization of In-One Protease-Esterase PluriZyme
Source: MDPI journal article supplement (doi:10.3390/ijms232113337), 2022-11-01
Supplement: s1 [file s1]

## Supporting Information

# Design and characterization of in-one protease-esterase PluriZyme

Laura Fernandez-Lopez<sup>1,†</sup>, Sergi Roda<sup>2,†</sup>, Jose L. Gonzalez-Alfonso<sup>1</sup>, Francisco J. Plou<sup>1</sup>, Víctor Guallar<sup>2,\*</sup> and Manuel Ferrer<sup>1\*</sup>

## Content

|                  |       |
|------------------|-------|
| Table S1.....    | 2     |
| Figure S1.....   | 2     |
| Figure S2.....   | 3     |
| Figure S3.....   | 3     |
| Figure S4.....   | 4-7   |
| Figure S5.....   | 7     |
| Figure S6.....   | 8     |
| Figure S7.....   | 9     |
| Figure S8.....   | 9-10  |
| Figure S9.....   | 10    |
| Figure S10.....  | 11    |
| Raw Dataset..... | 12-18 |

**Table S1:** Absolute and relative number of accepted and total catalytic events (at 3.75 Å, 4.25 Å, and 5 Å) of EH<sub>1AB1C</sub> from the local exploration for the different dipeptide substrates (A) and L-carnosine (B).

A)

| Dipeptide substrate | Number of accepted catalytic events [3.75 Å] | Number of total catalytic events [3.75 Å] | Number of accepted catalytic events [4.25 Å] | Number of total catalytic events [4.25 Å] | Number of accepted catalytic events [5 Å] | Number of total catalytic events [5 Å] |
|---------------------|----------------------------------------------|-------------------------------------------|----------------------------------------------|-------------------------------------------|-------------------------------------------|----------------------------------------|
| AH                  | 129 (0.265 %)                                | 2121 (0.422 %)                            | 443 (0.91 %)                                 | 7708 (1.533 %)                            | 779 (1.6 %)                               | 12349 (2.455 %)                        |
| AQ                  | 17 (0.04 %)                                  | 97 (0.019 %)                              | 105 (0.248 %)                                | 1709 (0.341 %)                            | 421 (0.995 %)                             | 5433 (1.083 %)                         |
| DI                  | 3 (0.012 %)                                  | 6 (0.001 %)                               | 68 (0.279 %)                                 | 1103 (0.22 %)                             | 144 (0.59 %)                              | 1597 (0.318 %)                         |
| EA                  | 14 (0.034 %)                                 | 101 (0.02 %)                              | 584 (1.416 %)                                | 2887 (0.571 %)                            | 1200 (2.91 %)                             | 11398 (2.255 %)                        |
| FF                  | 0                                            | 0                                         | 7 (0.025 %)                                  | 58 (0.012 %)                              | 41 (0.145 %)                              | 1468 (0.296 %)                         |
| KA                  | 5 (0.013 %)                                  | 10 (0.002 %)                              | 412 (1.093 %)                                | 2840 (0.581 %)                            | 1197 (3.177 %)                            | 11745 (2.402 %)                        |
| LA                  | 14 (0.033 %)                                 | 77 (0.015 %)                              | 777 (1.858 %)                                | 3748 (0.74 %)                             | 1163 (2.781 %)                            | 7051 (1.391 %)                         |
| LL                  | 0                                            | 0                                         | 17 (0.044 %)                                 | 124 (0.025 %)                             | 67 (0.172 %)                              | 621 (0.124 %)                          |
| NV                  | 0                                            | 0                                         | 7 (0.018 %)                                  | 49 (0.01 %)                               | 371 (0.935 %)                             | 3211 (0.638 %)                         |
| PF                  | 58 (0.171 %)                                 | 1294 (0.259 %)                            | 495 (1.456 %)                                | 6355 (1.27 %)                             | 657 (1.933 %)                             | 7984 (1.596 %)                         |
| QQ                  | 20 (0.065 %)                                 | 233 (0.047 %)                             | 128 (0.415 %)                                | 2656 (0.536 %)                            | 295 (0.955 %)                             | 4529 (0.914 %)                         |
| RG                  | 9 (0.029 %)                                  | 36 (0.007 %)                              | 171 (0.553 %)                                | 2301 (0.465 %)                            | 1016 (3.286 %)                            | 9615 (1.941 %)                         |
| SW                  | 47 (0.147 %)                                 | 1267 (0.256 %)                            | 444 (1.393 %)                                | 4699 (0.949 %)                            | 513 (1.609 %)                             | 5177 (1.045 %)                         |
| TM                  | 38 (0.095 %)                                 | 570 (0.112 %)                             | 404 (1.014 %)                                | 7220 (1.418 %)                            | 635 (1.594 %)                             | 10478 (2.057 %)                        |
| YN                  | 20 (0.081 %)                                 | 297 (0.06 %)                              | 56 (0.227 %)                                 | 838 (0.17 %)                              | 72 (0.292 %)                              | 950 (0.192 %)                          |
| YY                  | 0                                            | 0                                         | 0                                            | 0                                         | 0                                         | 0                                      |

B)

| Dipeptide substrate | Number of accepted catalytic events [3.75 Å] | Number of total catalytic events [3.75 Å] | Number of accepted catalytic events [4.25 Å] | Number of total catalytic events [4.25 Å] | Number of accepted catalytic events [5 Å] | Number of total catalytic events [5 Å] |
|---------------------|----------------------------------------------|-------------------------------------------|----------------------------------------------|-------------------------------------------|-------------------------------------------|----------------------------------------|
| L-carnosine         | 26 (0.102 %)                                 | 433 (0.098 %)                             | 166 (0.654 %)                                | 2344 (0.531 %)                            | 425 (1.675 %)                             | 5082 (1.151 %)                         |

**Table S2:** predicted  $\Delta\Delta G_{(\text{mut-WT})}$  of the EH<sub>1AB1C</sub> and its alternative calculated using the module of thermodynamic stability from HotSpot Wizard (see reference [45]) in both EH<sub>1A</sub> and EH<sub>1AB1</sub> crystal structures.

| Variant                           | $\Delta\Delta G_{(\text{mut-WT})}$ [5JD4] | $\Delta\Delta G_{(\text{mut-WT})}$ [6RB0] |
|-----------------------------------|-------------------------------------------|-------------------------------------------|
| EH <sub>1AB1C</sub> (L24C)        | 6                                         | 4.2                                       |
| EH <sub>1AB1C</sub> * (L24C/V36H) | 6.8                                       | 31.4                                      |

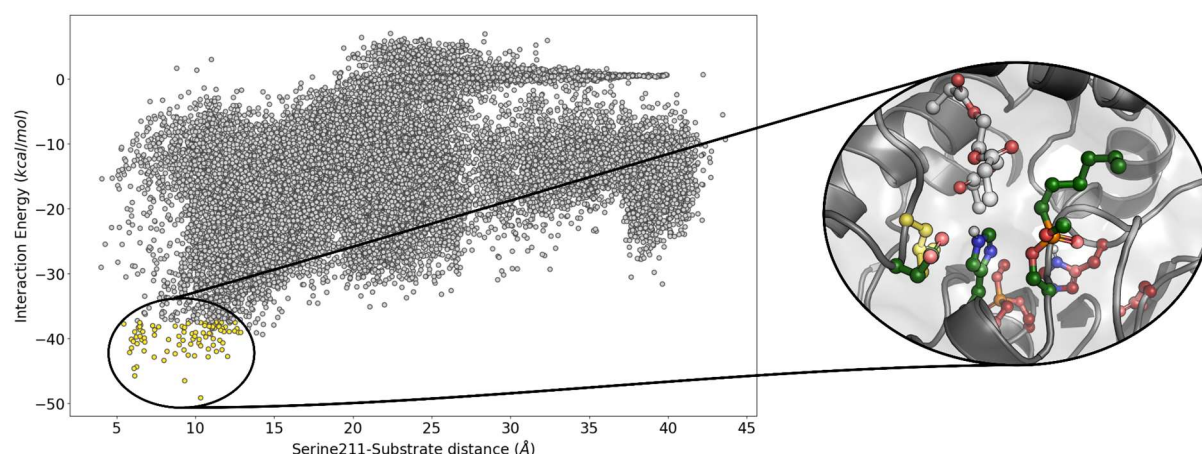

**Figure S1.** Global exploration of the potential hydrolase sites in the EH<sub>1AB1</sub> structure with the methyl hydrogen (R)-hexylphosphonate inhibitor bound to both catalytic serine residues. Accepted PELE steps around, what we called site C, are highlighted in the energetic profile with a yellow color. On the right, we represent a binding pose of the probe ester in site C. The main active site has the C atoms stained in maroon, the artificial active site has them stained in dark green, and the potential residue to mutate to cysteine to add a protease site has them stained in yellow. The energy profile was created with the Matplotlib library (see reference [28]).

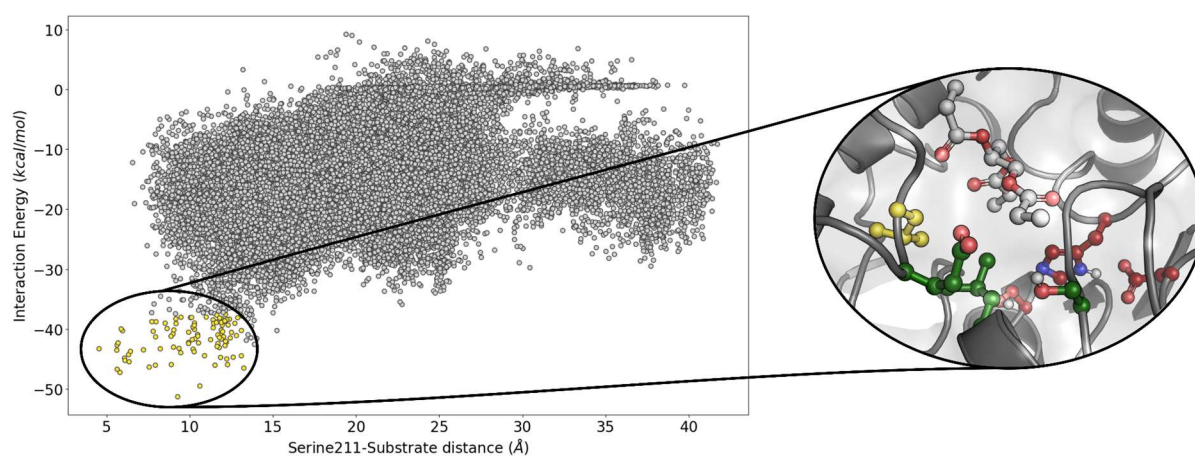

**Figure S2.** Global exploration of the potential hydrolase sites in the EH<sub>1A</sub> structure. Accepted PELE steps around, what we called site C, are highlighted in the energetic profile with a yellow color. On the right, we represent a binding pose of the probe ester in site C. The main active site has the C atoms stained in maroon, the artificial active site has them stained in dark green, and the potential residue to mutate to cysteine to add a protease site has them stained in yellow. The energy profile was created with the Matplotlib library (see reference [28]).

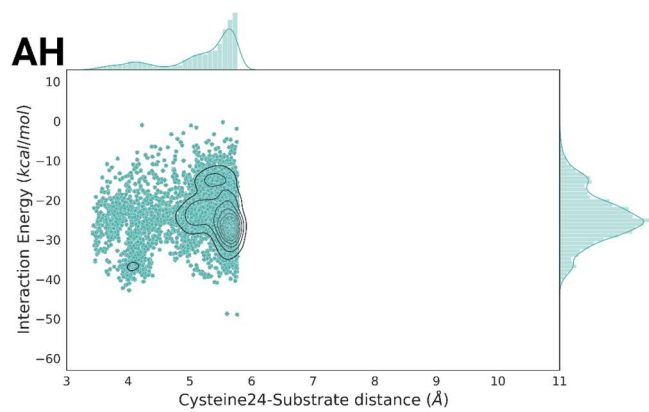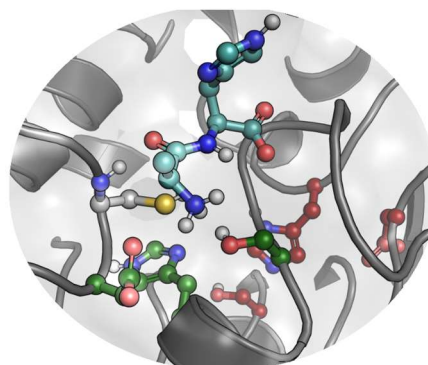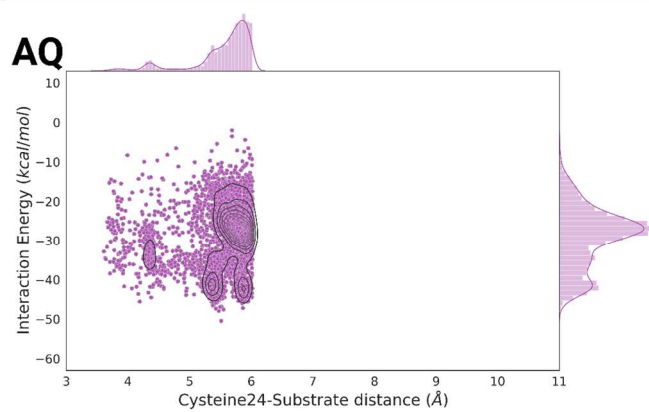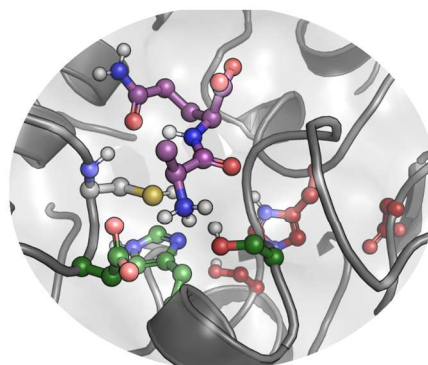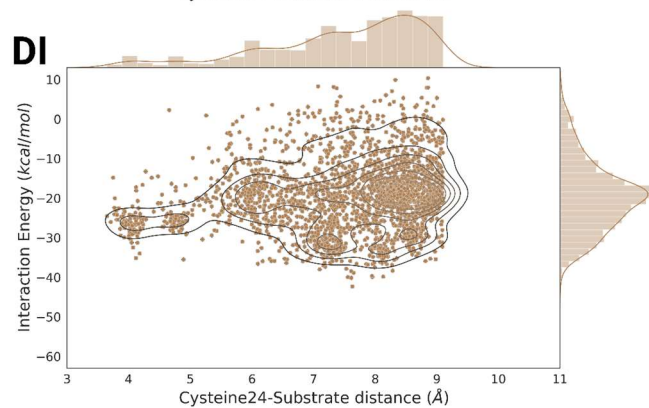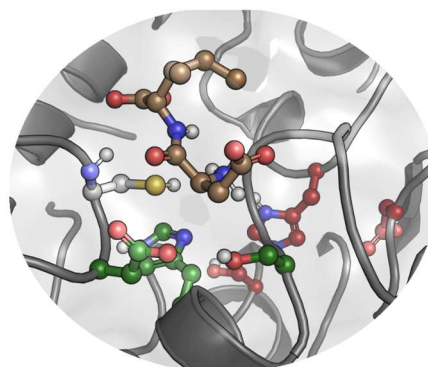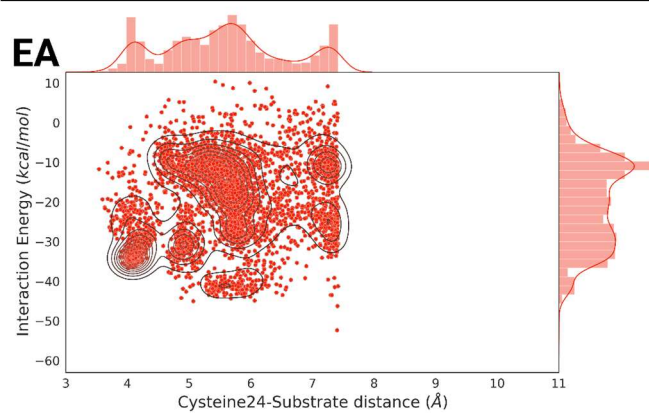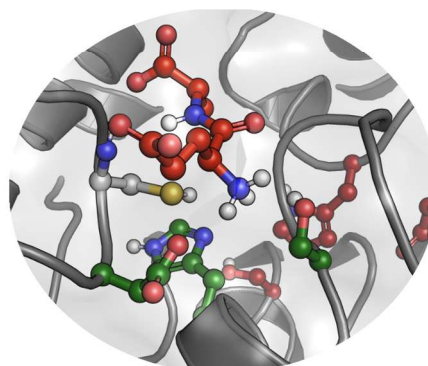

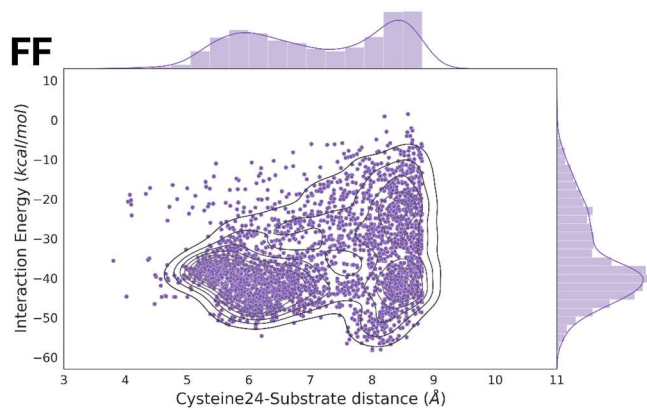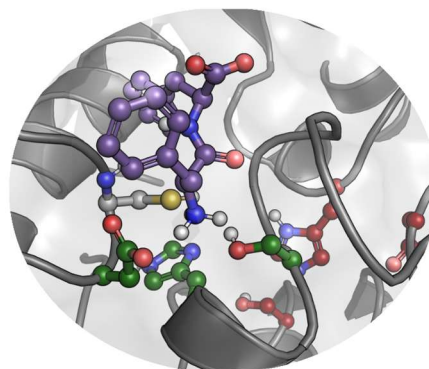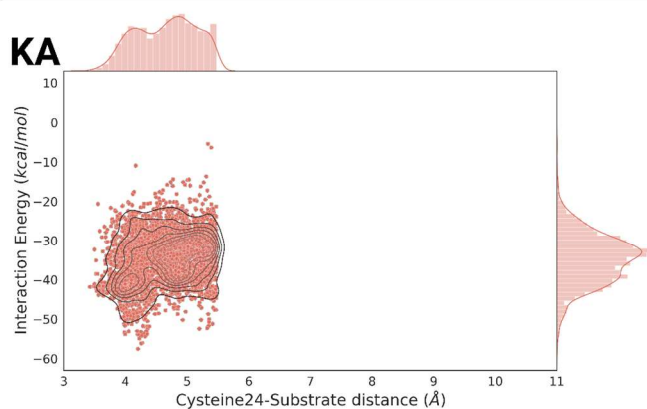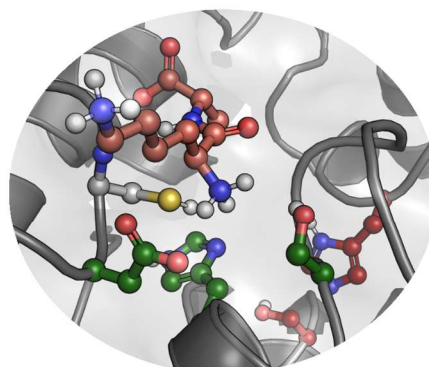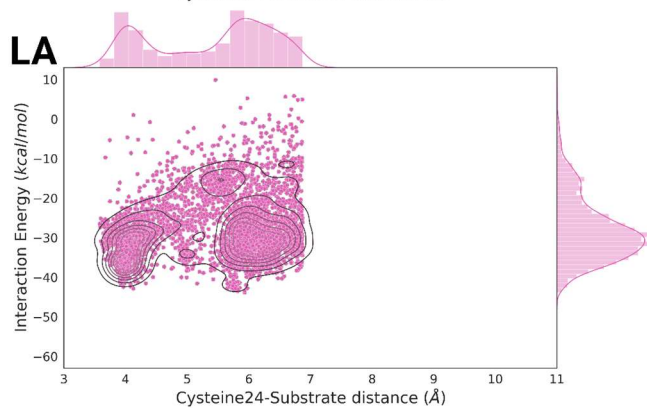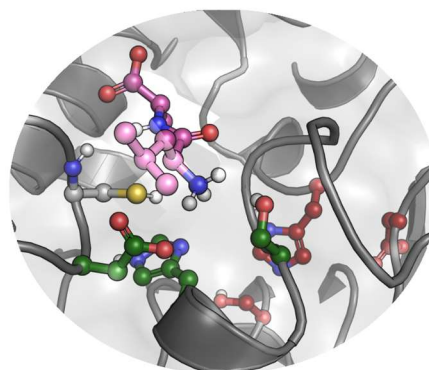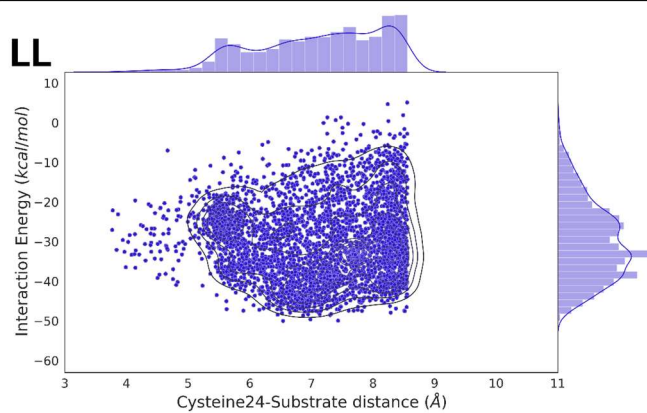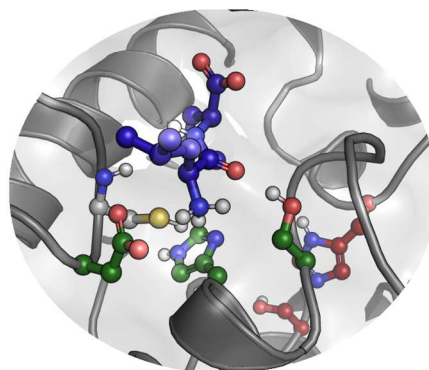



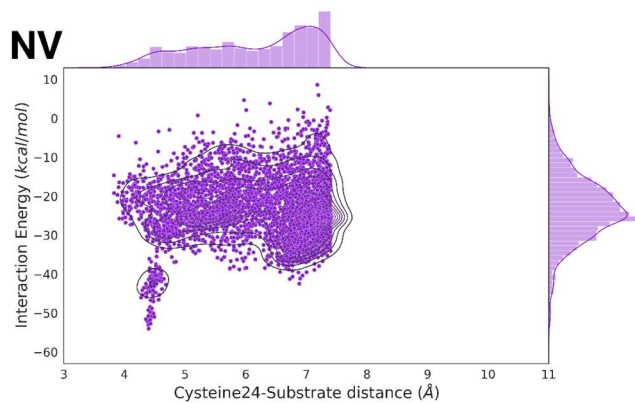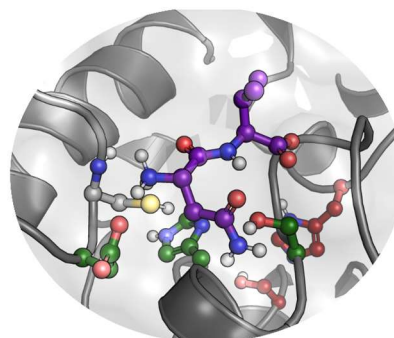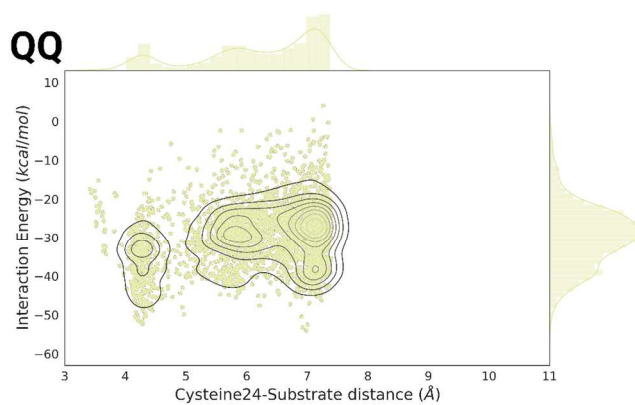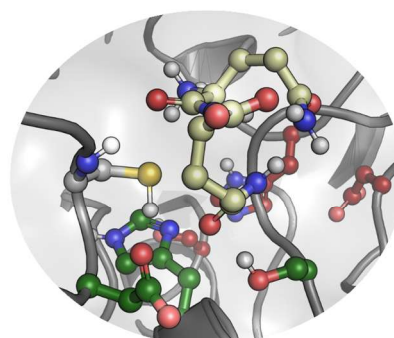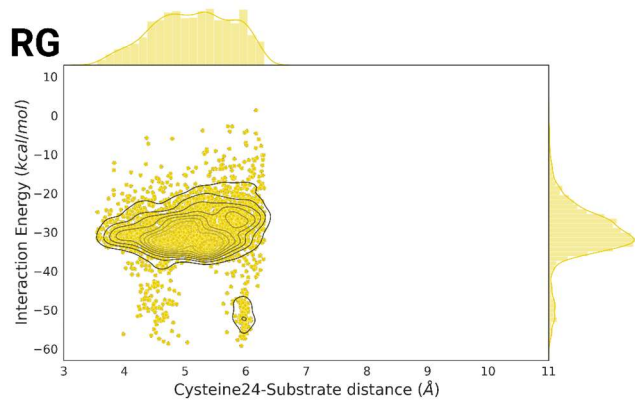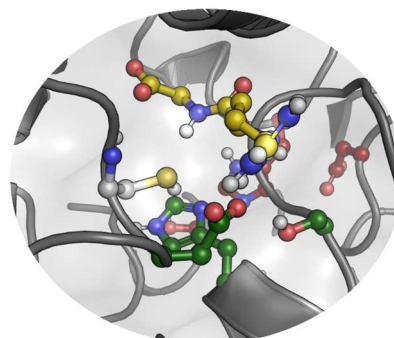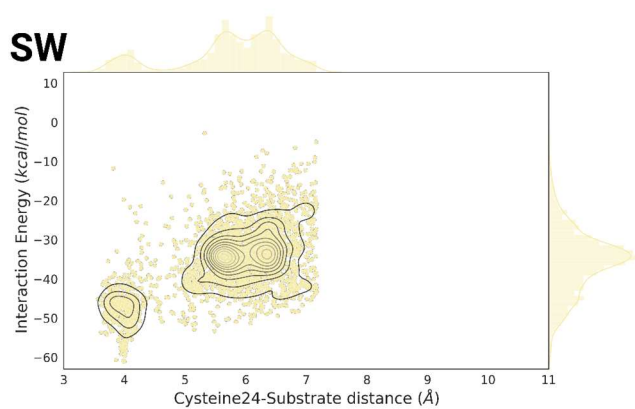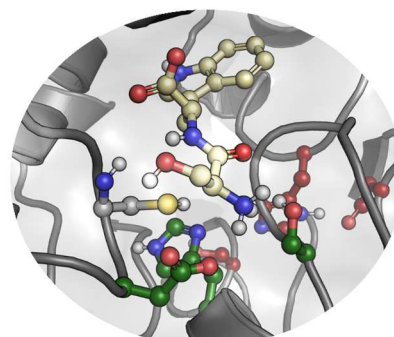

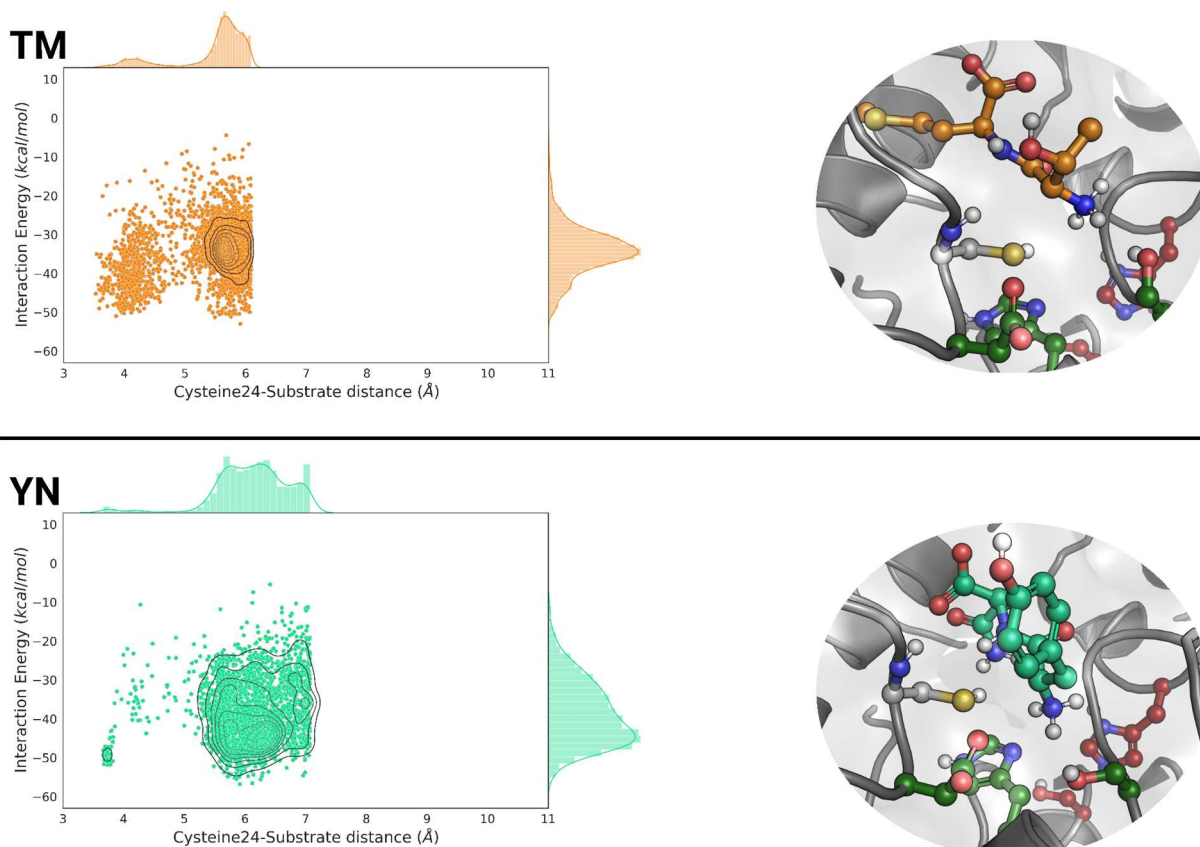

**Figure S3.** EH<sub>1ABIC</sub> density plots of the distribution of the catalytic cysteine-substrate distance against the interaction energy for the other simulated dipeptide substrates. Only the 10% lowest percentile regarding the distance is shown. On the right, we represent a catalytic pose of the dipeptide substrate in the protease site. The main active site has the C atoms stained in maroon, the artificial active site has them stained in dark green, the cysteine residue from the protease site has them stained in yellow, and each substrate has them stained in a particular color. The energy profiles were created with the Matplotlib library (see reference [28]).

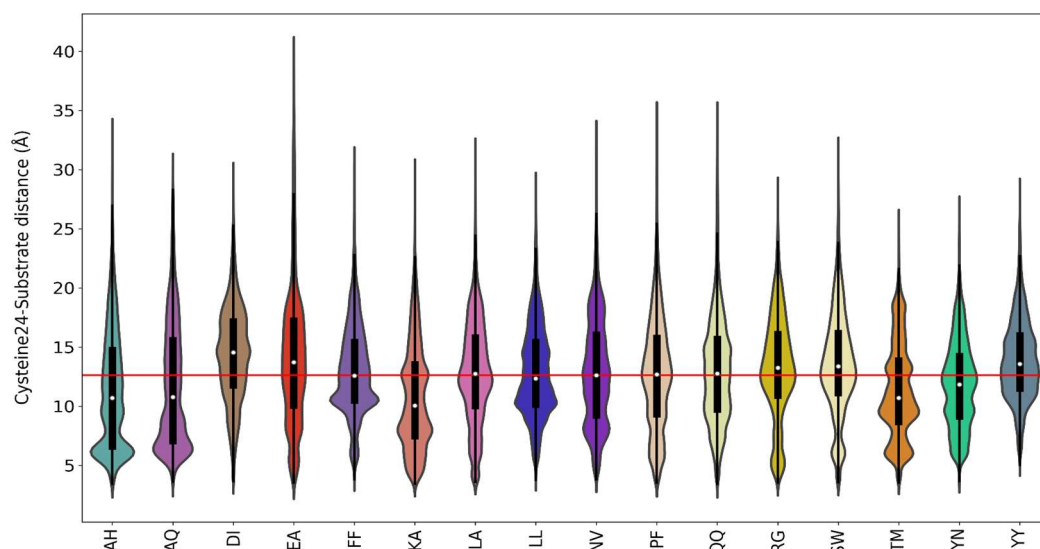

**Figure S4.** Violin plot representing the cysteine-substrate distance along all the accepted PELE steps from the local explorations for the different dipeptide substrates against EH<sub>1ABIC</sub>. The red line indicates the average value of the metric in all simulations. The figure was created with the Matplotlib library (see reference [28]).

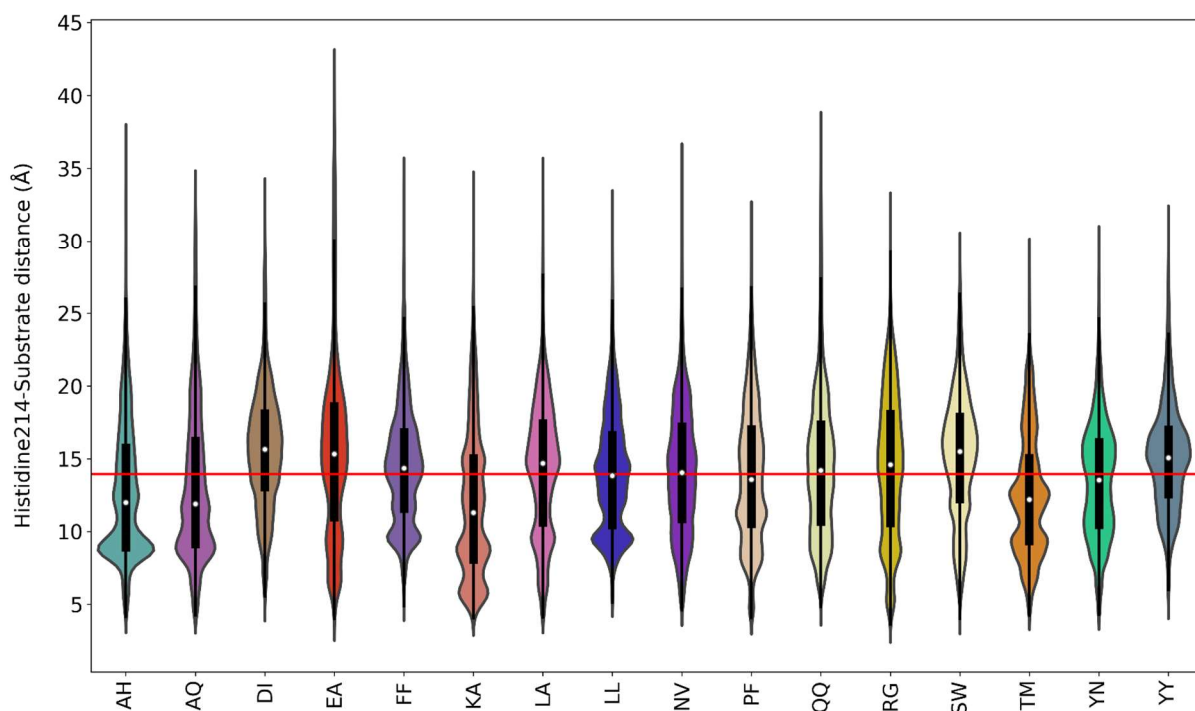

**Figure S5.** Violin plot representing the histidine-substrate distance along all the accepted PELE steps from the local explorations for the different dipeptide substrates against EH<sub>1ABIC</sub>. The red line indicates the average value of the metric in all simulations. The figure was created with the Matplotlib library (see reference [28]).

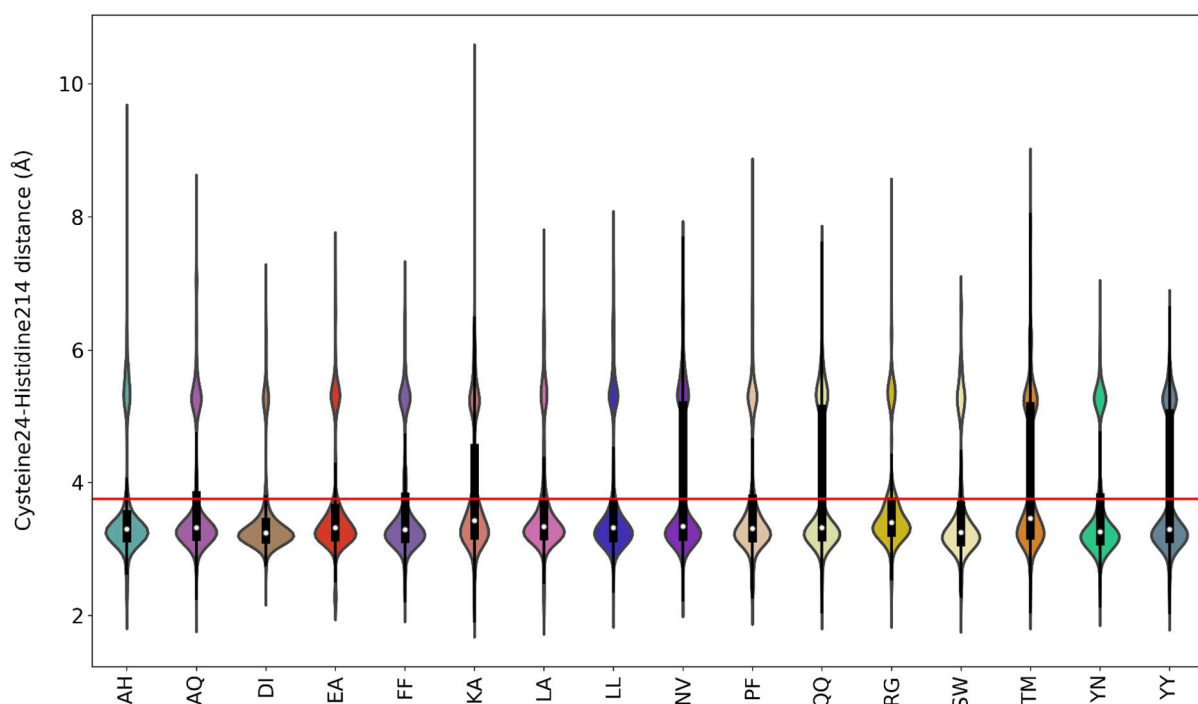

**Figure S6.** Violin plot representing the cysteine-histidine distance along all the accepted PELE steps from the local explorations for the different dipeptide substrates against EH<sub>1ABIC</sub>. The red line indicates the average value of the metric in all simulations. The figure was created with the Matplotlib library (see reference [28]).



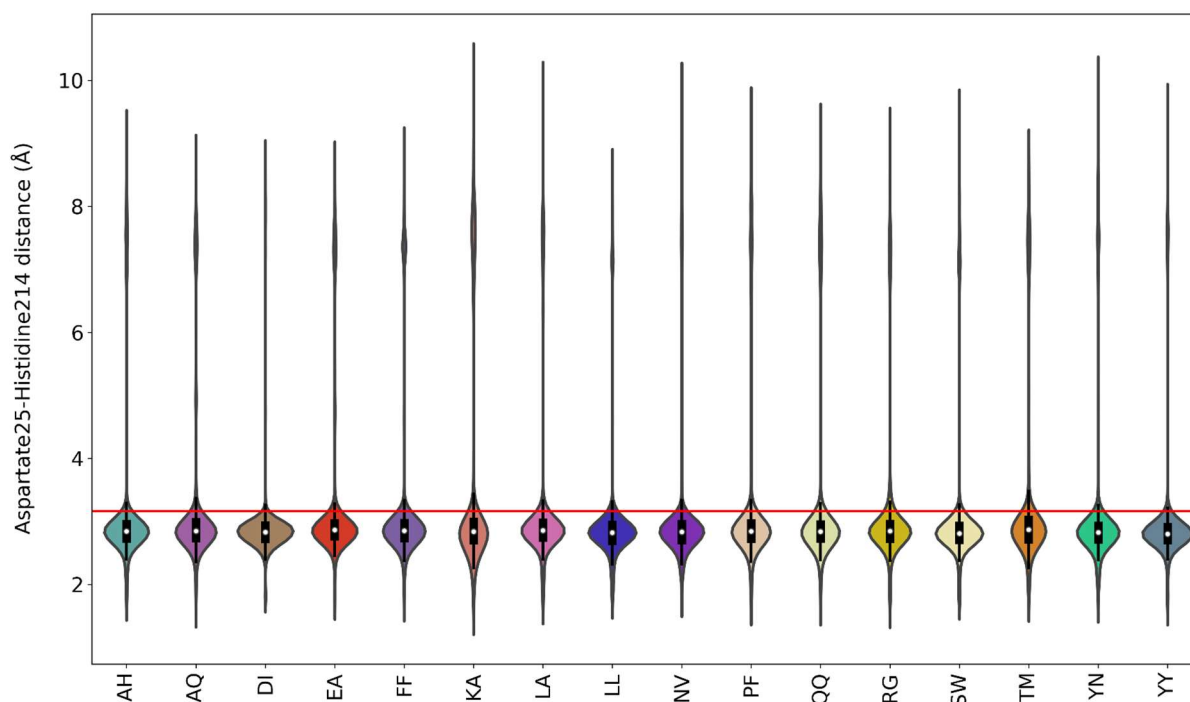

**Figure S7.** Violin plot representing the aspartate-histidine distance along all the accepted PELE steps from the local explorations for the different dipeptide substrates against EH<sub>1AB1C</sub>. The red line indicates the average value of the metric in all simulations. The figure was created with the Matplotlib library (see reference [28]).

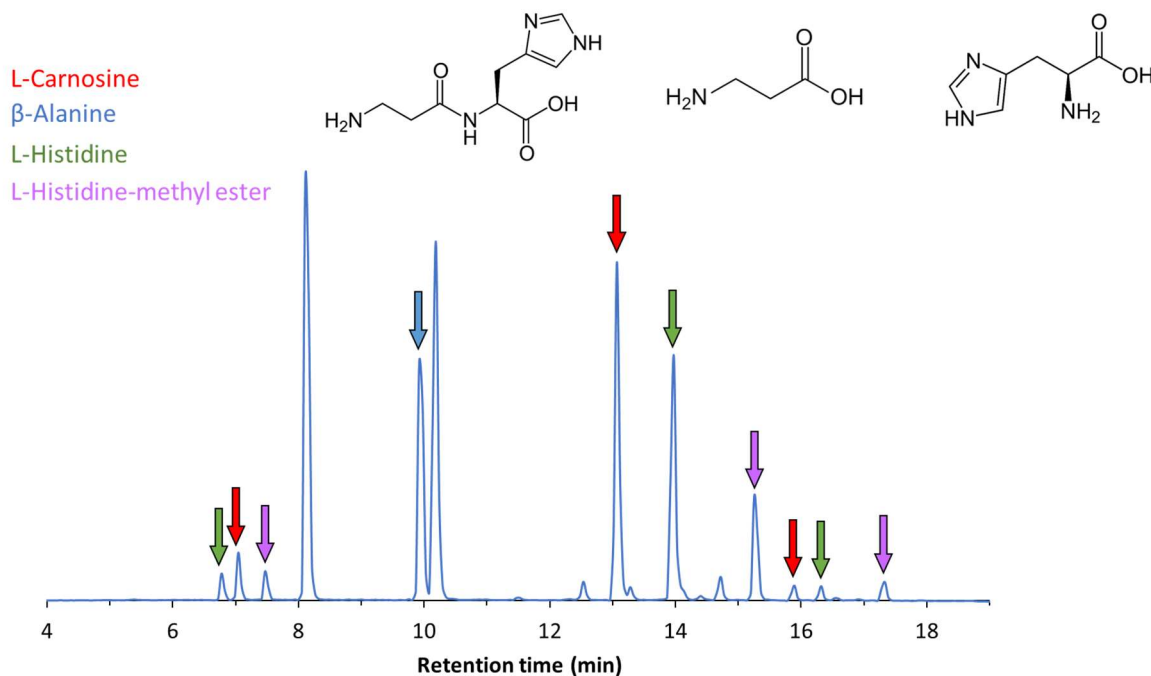

**Figure S8.** HPLC chromatograms representing the elution time of all substrates, intermediates and final products identified. As shown after derivatization some of the chemicals elute at different times (demonstrated by analysing each single chemical; not shown) and for the calculation of the concentration and conversion for each of them, the areas of each peak representing each chemical, were considered.

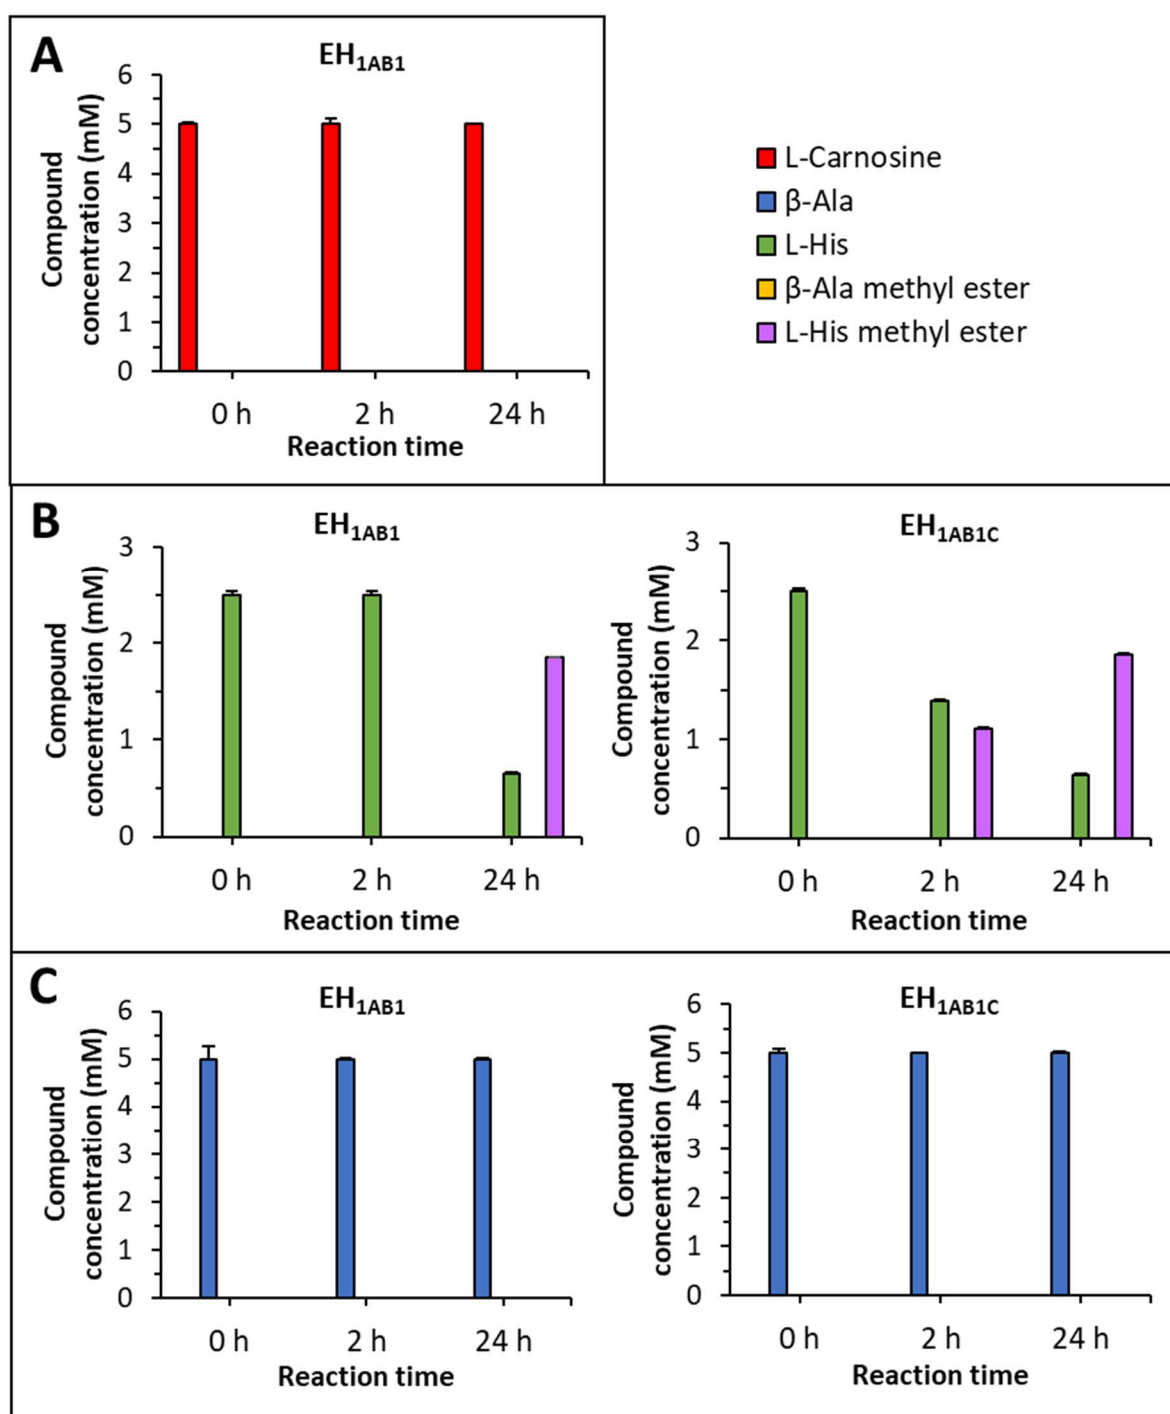

**Figure S9.** Concentrations of substrates and products obtained for the conversion of L-carnosine (A), L-histidine (B) and β-alanine (C) with whole cells expressing EH<sub>1AB1</sub> *PluriZyme* (left panels) or EH<sub>1AB1C</sub> *PluriZyme* (right panels) in the presence of methanol. The figure was created using SigmaPlot 14.0 software. As can be seen in panel A, the original EH<sub>1AB1</sub> *PluriZyme* does not hydrolyse L-carnosine or esterify it. The results in panels B and C demonstrate that both the original EH<sub>1AB1</sub> *PluriZyme* and the mutant EH<sub>1AB1C</sub> *PluriZyme* esterify L-histidine, but not β-alanine.

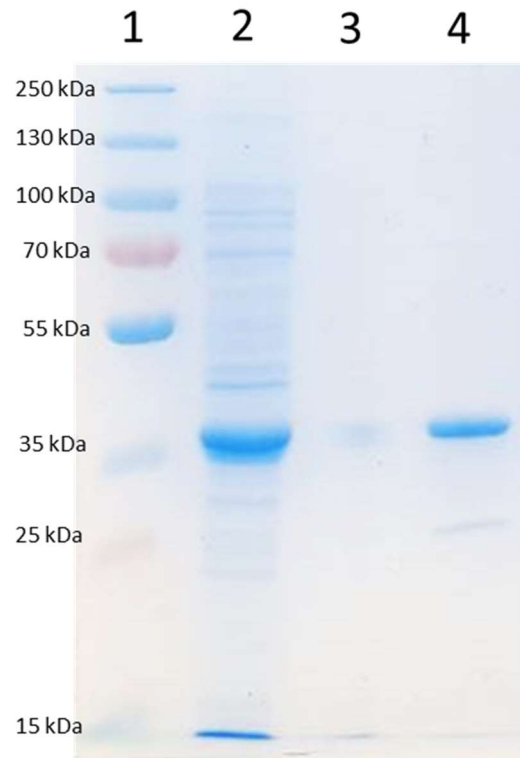

**Figure S10.** SDS-PAGE gel showing steps of EH<sub>1AB1C</sub> purification. Twelve percent SDS-PAGE gel stained with Coomassie blue. Lane 1 contains molecular weight markers. Lane 2 contains whole cell lysate of *E. coli* expressing soluble protein. Lane 3 shows the whole cell lysate of *E. coli* expressing insoluble protein. Lane 4 shows the His-tagged protein and demonstrates protein purity of >95%.

(A)

| pH  | Fluorescence 485/20,528/20 |     |
|-----|----------------------------|-----|
|     | EH <sub>1AB1C</sub>        |     |
| 3   | 4                          | 8   |
| 3,5 | 12                         | 14  |
| 4   | 20                         | 22  |
| 4,5 | 23                         | 30  |
| 5   | 30                         | 35  |
| 5,5 | 68                         | 75  |
| 6   | 122                        | 105 |
| 6,5 | 133                        | 133 |
| 7   | 174                        | 180 |
| 7,5 | 145                        | 146 |
| 8   | 115                        | 132 |
| 8,5 | 109                        | 122 |

| pH  | Relative activity (%)                  |     |
|-----|----------------------------------------|-----|
|     | EH <sub>1AB1C</sub> (average % and SD) |     |
| 3   | 3,4                                    | 1,6 |
| 3,5 | 7,4                                    | 0,8 |
| 4   | 11,9                                   | 0,8 |
| 4,5 | 15                                     | 2,8 |
| 5   | 18,4                                   | 2   |
| 5,5 | 40,4                                   | 2,8 |
| 6   | 64,1                                   | 6,8 |
| 6,5 | 75,1                                   | 0   |
| 7   | 100                                    | 2,4 |
| 7,5 | 82,2                                   | 0,4 |
| 8   | 69,8                                   | 6,8 |
| 8,5 | 65,3                                   | 5,2 |

(B)

| T (°C) | Absorbance at 440 nm |        |
|--------|----------------------|--------|
|        | EH <sub>1AB1C</sub>  |        |
| 20     | 0,024                | 0,027  |
| 30     | 0,054                | 0,055  |
| 40     | 0,076                | 0,067  |
| 50     | 0,096                | 0,096  |
| 60     | 0,135                | 0,134  |
| 70     | 0,143                | 0,141  |
| 75     | 0,137                | 0,147  |
| 80     | 0,138                | 0,142  |
| 85     | 0,128                | 0,124  |
| 90     | 0,0112               | 0,0112 |

| T (°C) | Relative activity (%) |     |
|--------|-----------------------|-----|
|        | (average % and SD)    |     |
| 20     | 18                    | 1,5 |
| 30     | 38,4                  | 0,5 |
| 40     | 50,4                  | 4,5 |
| 50     | 67,6                  | 0   |
| 60     | 94,7                  | 0,5 |
| 70     | 100                   | 1   |
| 75     | 100                   | 5   |
| 80     | 98,6                  | 2   |
| 85     | 88,7                  | 2   |
| 90     | 7,8                   | 0   |

(C)

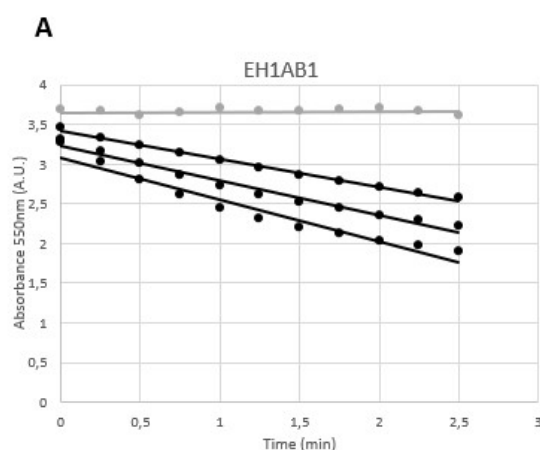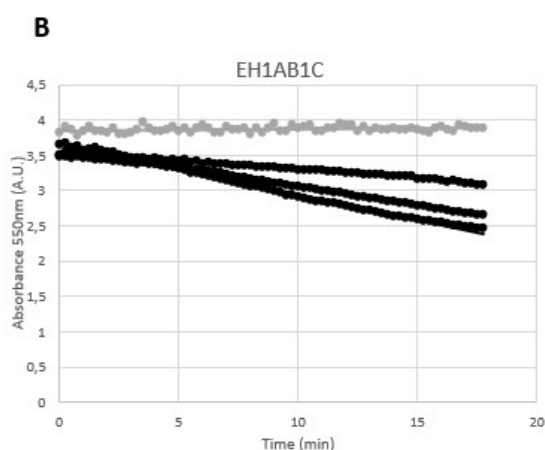

(D)

- Hydrolysis (buffer, no methanol) raw data (Figure 6A), in the presence of EH<sub>1AB1C</sub>.

|                   | Area - Average |             |             |                  |
|-------------------|----------------|-------------|-------------|------------------|
| Reaction time (h) | Carnosine      | β-Ala       | His         | His-methyl ester |
| 0                 | 66045886.33    | 0           | 0           | 0                |
| 1                 | 56405937.67    | 9510840.333 | 12435133.33 | 0                |
| 2                 | 20673479.67    | 18079872    | 26227694    | 0                |
| 24                | 5599927        | 34623204    | 56609214.33 | 0                |

|                   | Area - Deviation |            |            |                  |
|-------------------|------------------|------------|------------|------------------|
| Reaction time (h) | Carnosine        | β-Ala      | His        | His-methyl ester |
| 0                 | 925255.158       | 0          | 0          | 0                |
| 1                 | 4081705.52       | 129504.134 | 1999902.55 | 0                |
| 2                 | 3855347.19       | 468065.626 | 3379406.28 | 0                |
| 24                | 1165884.48       | 620605.567 | 620605.567 | 0                |

|                   | Sample concentration (μM) |             |             |                  |             |                  |
|-------------------|---------------------------|-------------|-------------|------------------|-------------|------------------|
| Reaction time (h) | Carnosine                 | β-Ala       | His         | His-methyl ester | Total       | Total (residues) |
| 0                 | 417.6392355               | 0           | 0           | 0                | 417.6392355 | 835.2784709      |
| 1                 | 356.6813013               | 124.2711031 | 103.7705251 | 0                | 584.7229295 | 941.4042308      |
| 2                 | 130.7281456               | 236.2362902 | 218.868709  | 0                | 585.8331447 | 716.5612903      |
| 24                | 35.41097502               | 452.3957509 | 472.4008773 | 0                | 960.2076032 | 995.6185782      |

|                   | SD (μM)    |            |            |                  |
|-------------------|------------|------------|------------|------------------|
| Reaction time (h) | Carnosine  | β-Ala      | His        | His-methyl ester |
| 0                 | 5.850824   | 0          | 0          | 0                |
| 1                 | 25.8105457 | 1.69213456 | 16.6890802 | 0                |
| 2                 | 24.3791755 | 6.1158667  | 28.2009654 | 0                |
| 24                | 7.37243649 | 8.10899308 | 5.17892039 | 0                |

| Sample concentration in reaction medium (mM) -Normalized to (5 mM carnosine) |           |       |       |                  |       | SD mM             |           |       |       |                  |
|------------------------------------------------------------------------------|-----------|-------|-------|------------------|-------|-------------------|-----------|-------|-------|------------------|
| Reaction time (h)                                                            | Carnosine | β-Ala | His   | His-methyl ester | Total | Reaction time (h) | Carnosine | β-Ala | His   | His-methyl ester |
| 0 h                                                                          | 5.000     | 0.000 | 0.000 | 0                | 5.000 | 0                 | 0.035     | 0.000 | 0.000 | 0.000            |
| 1 h                                                                          | 3.789     | 1.320 | 1.102 | 0                | 6.211 | 1                 | 0.137     | 0.018 | 0.177 | 0.000            |
| 2 h                                                                          | 1.824     | 3.297 | 3.054 | 0                | 8.176 | 2                 | 0.170     | 0.085 | 0.394 | 0.000            |
| 24 h                                                                         | 0.356     | 4.544 | 4.745 | 0                | 9.644 | 24                | 0.037     | 0.081 | 0.052 | 0.000            |



- Cascade reaction (with metanol) raw data (Figure 6B), in the presence of EH<sub>1AB1C</sub>.

| Reaction time (h) | Area - Average |             |             |                  |
|-------------------|----------------|-------------|-------------|------------------|
|                   | Carnosine      | β-Ala       | His         | His-methyl ester |
| 0                 | 72916723.33    | 0           | 0           | 0                |
| 1                 | 55722512.67    | 9406029     | 7916764     | 4090492          |
| 2                 | 21611397       | 19710882    | 17615182.33 | 8929280.333      |
| 24                | 4923047        | 34745890.67 | 16872401.67 | 26284110.33      |

| Reaction time (h) | Area - Deviation |            |            |                  |
|-------------------|------------------|------------|------------|------------------|
|                   | Carnosine        | β-Ala      | His        | His-methyl ester |
| 0                 | 11167492.4       | 0          | 0          | 0                |
| 1                 | 6726467.34       | 34811.0622 | 1241768.93 | 844628.1463      |
| 2                 | 4946823.13       | 264351.172 | 2486694.35 | 2122136.349      |
| 24                | 1081449.47       | 369638.206 | 369638.206 | 5926748.901      |

| Reaction time (h) | Sample concentration (μM) |             |             |                  | Total       | Total (residues) | Total His+ His-ME |
|-------------------|---------------------------|-------------|-------------|------------------|-------------|------------------|-------------------|
|                   | Carnosine                 | β-Ala       | His         | His-methyl ester |             |                  |                   |
| 0                 | 461.0867728               | 0           | 0           | 0                | 461.0867728 | 922.1735455      | 0                 |
| 1                 | 352.3596832               | 122.9016111 | 66.06497376 | 34.13493779      | 575.4612058 | 893.6859513      | 100.1999115       |
| 2                 | 136.6590385               | 257.5474893 | 146.997758  | 74.51436861      | 615.7186544 | 677.8633242      | 221.5121266       |
| 24                | 31.13074408               | 453.9988066 | 140.7992929 | 219.3395002      | 845.2683439 | 657.0595877      | 360.1387932       |

| Reaction time (h) | SD (μM)    |            |            |                  |
|-------------------|------------|------------|------------|------------------|
|                   | Carnosine  | β-Ala      | His        | His-methyl ester |
| 0                 | 70.6173123 | 0          | 0          | 0                |
| 1                 | 42.53462   | 0.45485036 | 10.3624956 | 7.048376877      |
| 2                 | 31.2810918 | 3.45408088 | 20.7513319 | 17.70911476      |
| 24                | 6.83851415 | 4.82978853 | 3.08461113 | 49.45840379      |

| Sample concentration in reaction medium (mM) -Normalized to (5 mM carnosine) |              |       |       |                  |       |
|------------------------------------------------------------------------------|--------------|-------|-------|------------------|-------|
| Reaction time (h)                                                            | L- Carnosine | β-Ala | His   | His-methyl ester | Total |
| 0 h                                                                          | 5.000        | 0.000 | 0.000 | 0.000            | 5.000 |
| 1 h                                                                          | 3.943        | 1.229 | 0.810 | 0.419            | 6.401 |
| 2 h                                                                          | 2.016        | 2.575 | 1.709 | 0.866            | 7.167 |
| 24 h                                                                         | 0.474        | 4.540 | 1.775 | 2.765            | 9.554 |

| SD mM             |           |       |       |                  |
|-------------------|-----------|-------|-------|------------------|
| Reaction time (h) | Carnosine | β-Ala | His   | His-methyl ester |
| 0                 | 0.383     | 0.000 | 0.000 | 0.000            |
| 1                 | 0.238     | 0.005 | 0.104 | 0.070            |
| 2                 | 0.231     | 0.035 | 0.208 | 0.177            |
| 24                | 0.052     | 0.048 | 0.031 | 0.495            |

(E)

- Cascade reaction (with metanol) raw data, in the presence of EH<sub>1AB1</sub> (Figure S9A).

| Area - Average    |             |       |     |                  |  | Area - Deviation  |            |       |     |                    |                  |
|-------------------|-------------|-------|-----|------------------|--|-------------------|------------|-------|-----|--------------------|------------------|
| Reaction time (h) | Carnosine   | β-Ala | His | His-methyl ester |  | Reaction time (h) | Carnosine  | β-Ala | His | β-Ala methyl ester | His-methyl ester |
| 0                 | 74291435,33 | 0     | 0   | 0                |  | 0                 | 609950,783 | 0     | 0   | 0                  | 0                |
| 2                 | 62687474,33 | 0     | 0   | 0                |  | 2                 | 3036089,87 | 0     | 0   | 0                  | 0                |
| 20                | 52139788    | 0     | 0   | 0                |  | 20                | 324015,542 | 0     | 0   | 0                  | 0                |

| Sample concentration (μM) |             |       |     |                  |                    |             | SD (μM)           |            |       |     |                    |                  |
|---------------------------|-------------|-------|-----|------------------|--------------------|-------------|-------------------|------------|-------|-----|--------------------|------------------|
| Reaction time (h)         | Carnosine   | β-Ala | His | His-methyl ester | β-Ala methyl ester | Total       | Reaction time (h) | Carnosine  | β-Ala | His | β-Ala methyl ester | His-methyl ester |
| 0                         | 469,779724  | 0     | 0   | 0                | 0                  | 469,779724  | 0                 | 3,85700598 | 0     | 0   |                    | 0                |
| 2                         | 396,4024151 | 0     | 0   | 0                | 0                  | 396,4024151 | 2                 | 19,1986257 | 0     | 0   |                    | 0                |
| 20                        | 329,7044283 | 0     | 0   | 0                | 0                  | 329,7044283 | 20                | 2,04890283 | 0     | 0   |                    | 0                |

| Sample concentration in reaction medium (mM) -Normalized to (5 mM carnosine) |             |       |       |                    |                    |       | SD mM             |           |       |       |                    |                  |
|------------------------------------------------------------------------------|-------------|-------|-------|--------------------|--------------------|-------|-------------------|-----------|-------|-------|--------------------|------------------|
| Reaction time (h)                                                            | L-Carnosine | β-Ala | L-His | L-His methyl ester | β-Ala methyl ester | Total | Reaction time (h) | Carnosine | β-Ala | His   | β-Ala methyl ester | His-methyl ester |
| 0                                                                            | 5,000       | 0,000 | 0,000 | 0                  |                    | 5,000 | 0                 | 0,021     | 0,000 | 0,000 | 0                  | 0,000            |
| 2                                                                            | 5,000       | 0,000 | 0,000 | 0                  |                    | 5,000 | 2                 | 0,121     | 0,000 | 0,000 | 0                  | 0,000            |
| 20                                                                           | 5,000       | 0,000 | 0,000 | 0                  |                    | 5,000 | 20                | 0,016     | 0,000 | 0,000 | 0                  | 0,000            |

- L- Histidine reaction (with metanol) raw data in the presence of EH<sub>1AB1</sub> (Figure S9B).

|                   | Area - Average |       |             |                  |
|-------------------|----------------|-------|-------------|------------------|
| Reaction time (h) | Carnosine      | β-Ala | His         | His-methyl ester |
| 0                 | 0              | 0     | 35535189.67 | 0                |
| 2                 | 0              | 0     | 31907237    | 0                |
| 24                | 0              | 0     | 12867910.33 | 36645382         |

|                   | Area - Deviation |       |            |                  |
|-------------------|------------------|-------|------------|------------------|
| Reaction time (h) | Carnosine        | β-Ala | His        | His-methyl ester |
| 0                 | 0                | 0     | 575075.85  | 0                |
| 2                 | 0                | 0     | 475937.293 | 0                |
| 24                | 0                | 0     | 392832.675 | 189697.3025      |

|                   | Sample concentration (μM) |       |             |                  |             |                  |
|-------------------|---------------------------|-------|-------------|------------------|-------------|------------------|
| Reaction time (h) | Carnosine                 | β-Ala | His         | His-methyl ester | Total       | Total (residuos) |
| 0                 | 0                         | 0     | 296.5392644 | 0                | 296.5392644 | 296.5392644      |
| 2                 | 0                         | 0     | 266.2641927 | 0                | 266.2641927 | 266.2641927      |
| 24                | 0                         | 0     | 107.3820261 | 305.8037602      | 413.1857863 | 413.1857863      |

|                   | SD (μM)   |       |            |                  |
|-------------------|-----------|-------|------------|------------------|
| Reaction time (h) | Carnosine | β-Ala | His        | His-methyl ester |
| 0                 | 0         | 0     | 4.79897732 | 0                |
| 2                 | 0         | 0     | 3.97167135 | 0                |
| 24                | 0         | 0     | 3.27816774 | 1.583013881      |

| Sample concentration in reaction medium (mM) -Normalized to (2.5 mM His) |             |              |       |                    |       |
|--------------------------------------------------------------------------|-------------|--------------|-------|--------------------|-------|
| Reaction time (h)                                                        | L-Carnosine | $\beta$ -Ala | L-His | L- His-methyl este | Total |
| 0 h                                                                      | 0.000       | 0.000        | 2.500 | 0.000              | 2.500 |
| 2 h                                                                      | 0.000       | 0.000        | 2.500 | 0.000              | 2.500 |
| 24 h                                                                     | 0.000       | 0.000        | 0.650 | 1.850              | 2.500 |

| SD mM             |           |              |       |                  |
|-------------------|-----------|--------------|-------|------------------|
| Reaction time (h) | Carnosine | $\beta$ -Ala | His   | His-methyl ester |
| 0                 | 0.000     | 0.000        | 0.040 | 0.000            |
| 2                 | 0.000     | 0.000        | 0.037 | 0.000            |
| 24                | 0.000     | 0.000        | 0.020 | 0.010            |

- Histidine reaction (with metanol) raw data in the presence of EH<sub>1AB1C</sub> (Figure S9B).

| Area - Average    |           |              |             |                  | Area - Deviation  |           |              |            |                  |
|-------------------|-----------|--------------|-------------|------------------|-------------------|-----------|--------------|------------|------------------|
| Reaction time (h) | Carnosine | $\beta$ -Ala | His         | His-methyl ester | Reaction time (h) | Carnosine | $\beta$ -Ala | His        | His-methyl ester |
| 0                 | 0         | 0            | 35111999    | 0                | 0                 | 0         | 0            | 401282.111 | 0                |
| 2                 | 0         | 0            | 25123322.67 | 19989914.67      | 2                 | 0         | 0            | 282187.094 | 162377.1727      |
| 24                | 0         | 0            | 14500647.67 | 41832287.33      | 24                | 0         | 0            | 87384.3772 | 297615.2006      |

|                   | Sample concentration (μM) |       |             |                  |       |             |                  |  | SD (μM)           |           |       |            |                  |
|-------------------|---------------------------|-------|-------------|------------------|-------|-------------|------------------|--|-------------------|-----------|-------|------------|------------------|
| Reaction time (h) | Carnosine                 | β-Ala | His         | His-methyl ester | Total |             | Total (residues) |  | Reaction time (h) | Carnosine | β-Ala | His        | His-methyl ester |
| 0                 | 0                         | 0     | 293.0077608 |                  | 0     | 293.0077608 | 293.0077608      |  | 0                 | 0         | 0     | 3.34867783 | 0                |
| 2                 | 0                         | 0     | 209.652789  | 166.8147728      |       | 376.4675618 | 376.4675618      |  | 2                 | 0         | 0     | 2.35483627 | 1.355028854      |
| 24                | 0                         | 0     | 121.0071321 | 349.0882089      |       | 470.095341  | 470.095341       |  | 24                | 0         | 0     | 0.72921797 | 2.483582991      |

| Sample concentration in reaction medium (mM) -Normalized to (2.5 mM His) |             |              |       |                    |       |
|--------------------------------------------------------------------------|-------------|--------------|-------|--------------------|-------|
| Reaction time (h)                                                        | L-Carnosine | $\beta$ -Ala | L-His | L- His-methyl este | Total |
| 0 h                                                                      | 0.000       | 0.000        | 2.500 | 0.000              | 2.500 |
| 2 h                                                                      | 0.000       | 0.000        | 1.392 | 1.108              | 2.500 |
| 24 h                                                                     | 0.000       | 0.000        | 0.644 | 1.856              | 2.500 |

| SD mM             |           |              |       |                  |
|-------------------|-----------|--------------|-------|------------------|
| Reaction time (h) | Carnosine | $\beta$ -Ala | His   | His-methyl ester |
| 0                 | 0.000     | 0.000        | 0.029 | 0.000            |
| 2                 | 0.000     | 0.000        | 0.016 | 0.009            |
| 24                | 0.000     | 0.000        | 0.004 | 0.013            |

- $\beta$ -Alanine reaction (with metanol) raw data in the presence of EH<sub>1AB1</sub> (Figure S9C).

| Area - Average    |           |              |     |                  | Area - Deviation  |           |              |     |                  |
|-------------------|-----------|--------------|-----|------------------|-------------------|-----------|--------------|-----|------------------|
| Reaction time (h) | Carnosine | $\beta$ -Ala | His | His-methyl ester | Reaction time (h) | Carnosine | $\beta$ -Ala | His | His-methyl ester |
| 0                 | 0         | 38621021.33  | 0   | 0                | 0                 | 0         | 1955503.02   | 0   | 0                |
| 2                 | 0         | 34250592     | 0   | 0                | 2                 | 0         | 112858.066   | 0   | 0                |
| 24                | 0         | 35603589.33  | 0   | 0                | 24                | 0         | 33521.6922   | 0   | 0                |

|                   | Sample concentration (μM) |             |     |                  |             |                  |                   | SD (μM)   |            |     |                  |  |
|-------------------|---------------------------|-------------|-----|------------------|-------------|------------------|-------------------|-----------|------------|-----|------------------|--|
| Reaction time (h) | Carnosine                 | β-Ala       | His | His-methyl ester | Total       | Total (residues) | Reaction time (h) | Carnosine | β-Ala      | His | His-methyl ester |  |
| 0                 | 0                         | 504.6322676 | 0   | 0                | 504.6322676 | 504.6322676      | 0                 | 0         | 25.5511089 | 0   | 0                |  |
| 2                 | 0                         | 447.527106  | 0   | 0                | 447.527106  | 447.527106       | 2                 | 0         | 1.47463272 | 0   | 0                |  |
| 24                | 0                         | 465.2057195 | 0   | 0                | 465.2057195 | 465.2057195      | 24                | 0         | 0.43800311 | 0   | 0                |  |

| Sample concentration in reaction medium (mM) -Normalized to (5 mM Ala) |             |              |       |                    |       | SD mM             |           |              |       |                  |
|------------------------------------------------------------------------|-------------|--------------|-------|--------------------|-------|-------------------|-----------|--------------|-------|------------------|
| Reaction time (h)                                                      | L-Carnosine | $\beta$ -Ala | L-His | L- His-methyl este | Total | Reaction time (h) | Carnosine | $\beta$ -Ala | His   | His-methyl ester |
| 0 h                                                                    | 0.000       | 5.000        | 0.000 | 0.000              | 5.000 | 0                 | 0.000     | 0.253        | 0.000 | 0.000            |
| 2 h                                                                    | 0.000       | 5.000        | 0.000 | 0.000              | 5.000 | 2                 | 0.000     | 0.016        | 0.000 | 0.000            |
| 24 h                                                                   | 0.000       | 5.000        | 0.000 | 0.000              | 5.000 | 24                | 0.000     | 0.005        | 0.000 | 0.000            |

- $\beta$ -Alanine reaction (with metanol) raw data in the presence of EH<sub>1AB1C</sub> (Figure S9C).

| Area - Average    |           |              |     |                  |
|-------------------|-----------|--------------|-----|------------------|
| Reaction time (h) | Carnosine | $\beta$ -Ala | His | His-methyl ester |
| 0                 | 0         | 37663773.33  | 0   | 0                |
| 2                 | 0         | 34222480     | 0   | 0                |
| 24                | 0         | 33938377.33  | 0   | 0                |

| Area - Deviation  |           |              |     |                  |
|-------------------|-----------|--------------|-----|------------------|
| Reaction time (h) | Carnosine | $\beta$ -Ala | His | His-methyl ester |
| 0                 | 0         | 715050.418   | 0   | 0                |
| 2                 | 0         | 67054.195    | 0   | 0                |
| 24                | 0         | 247115.117   | 0   | 0                |

|                   | Sample concentration (μM) |             |     |                  |             |                  |                   |           | SD (μM)    |     |                  |  |
|-------------------|---------------------------|-------------|-----|------------------|-------------|------------------|-------------------|-----------|------------|-----|------------------|--|
| Reaction time (h) | Carnosine                 | β-Ala       | His | His-methyl ester | Total       | Total (residues) | Reaction time (h) | Carnosine | β-Ala      | His | His-methyl ester |  |
| 0                 | 0                         | 492.1246173 | 0   | 0                | 492.1246173 | 492.1246173      | 0                 | 0         | 9.34303396 | 0   | 0                |  |
| 2                 | 0                         | 447.1597873 | 0   | 0                | 447.1597873 | 447.1597873      | 2                 | 0         | 0.87614748 | 0   | 0                |  |
| 24                | 0                         | 443.4476283 | 0   | 0                | 443.4476283 | 443.4476283      | 24                | 0         | 3.22887011 | 0   | 0                |  |

| Sample concentration in reaction medium (mM) -Normalized to (5 mM Ala) |             |              |       |                    |       | SD mM             |           |              |       |                  |
|------------------------------------------------------------------------|-------------|--------------|-------|--------------------|-------|-------------------|-----------|--------------|-------|------------------|
| Reaction time (h)                                                      | L-Carnosine | $\beta$ -Ala | L-His | L- His-methyl este | Total | Reaction time (h) | Carnosine | $\beta$ -Ala | His   | His-methyl ester |
| 0 h                                                                    | 0.000       | 5.000        | 0.000 | 0.000              | 5.000 | 0                 | 0.000     | 0.095        | 0.000 | 0.000            |
| 2 h                                                                    | 0.000       | 5.000        | 0.000 | 0.000              | 5.000 | 2                 | 0.000     | 0.010        | 0.000 | 0.000            |
| 24 h                                                                   | 0.000       | 5.000        | 0.000 | 0.000              | 5.000 | 24                | 0.000     | 0.036        | 0.000 | 0.000            |

**Raw Dataset.** (A) Raw fluorescence data (corresponding to Figure 3A) after the hydrolysis of BODIBY FL casein by EH<sub>1AB1C</sub>, at different pH values (corrected by background signal). Reaction conditions as described in Section 4.5. (B) Raw absorbance data (corresponding to Figure 3B) after the hydrolysis of azocasein by EH<sub>1AB1C</sub>, at different temperatures. Reaction conditions as described in Section 4.5. (B) Representative time-course curve for the hydrolysis of glyceryl tripropionate by EH<sub>1AB1C</sub> (corrected by background signal). Shown are the raw data (absorbance at 550 nm over time), corresponding to calculations of specific activity. Reaction conditions as described in Section 4.5. (A) Representative time-course curve for the hydrolysis of glyceryl tripropionate by EH<sub>1AB1C</sub> and EH<sub>1AB1</sub>. Shown are the raw data (absorbance at 550 nm over time), corresponding to calculations of specific activity. Reaction conditions as described in Section 4.5. (D)

Raw data and calculations corresponding to Figure 5 (cascade reaction with EH<sub>1AB1C</sub>). (E) Raw data and calculation for the control cascade reaction in the presence of EH<sub>1AB1C</sub>; as shown no reactions products were found.
